# Supplementary material for: The influence of marital status on survival in patients with oral tongue squamous cell carcinoma
Source: PubMed Central journal article supplement (PMC5669873; doi:10.18632/oncotarget.18538), 2017-06-17
Supplement: oncotarget-08-82092-s001.pdf [file oncotarget-08-82092-s001.pdf]

## The influence of marital status on survival in patients with oral tongue squamous cell carcinoma

### Supplementary Materials

**Supplementary Table 1: Pairwise comparison of univariate analysis among married, single, divorced/separated and widowed group**

| Characteristic             | Overall survival          |                | Tumor cause-specific survival |                |
|----------------------------|---------------------------|----------------|-------------------------------|----------------|
|                            | Log Rank<br>$\chi^2$ test | <i>P</i> value | Log Rank<br>$\chi^2$ test     | <i>P</i> value |
| Married-Single             | 239                       | < 0.001        | 23.1                          | < 0.001        |
| Married-Divorced/Separated | 196                       | < 0.001        | 92.6                          | < 0.001        |
| Married-Widowed            | 416                       | < 0.001        | 204                           | < 0.001        |
| Single-Divorced/Separated  | 0                         | 0.943          | 13.9                          | < 0.001        |
| Single-Widowed             | 43.5                      | < 0.001        | 61.9                          | < 0.001        |
| Divorced/Separated-Widowed | 40.3                      | < 0.001        | 18.4                          | < 0.001        |

Notes: OS, overall survival; TCSS, tumor cause-specific survival.

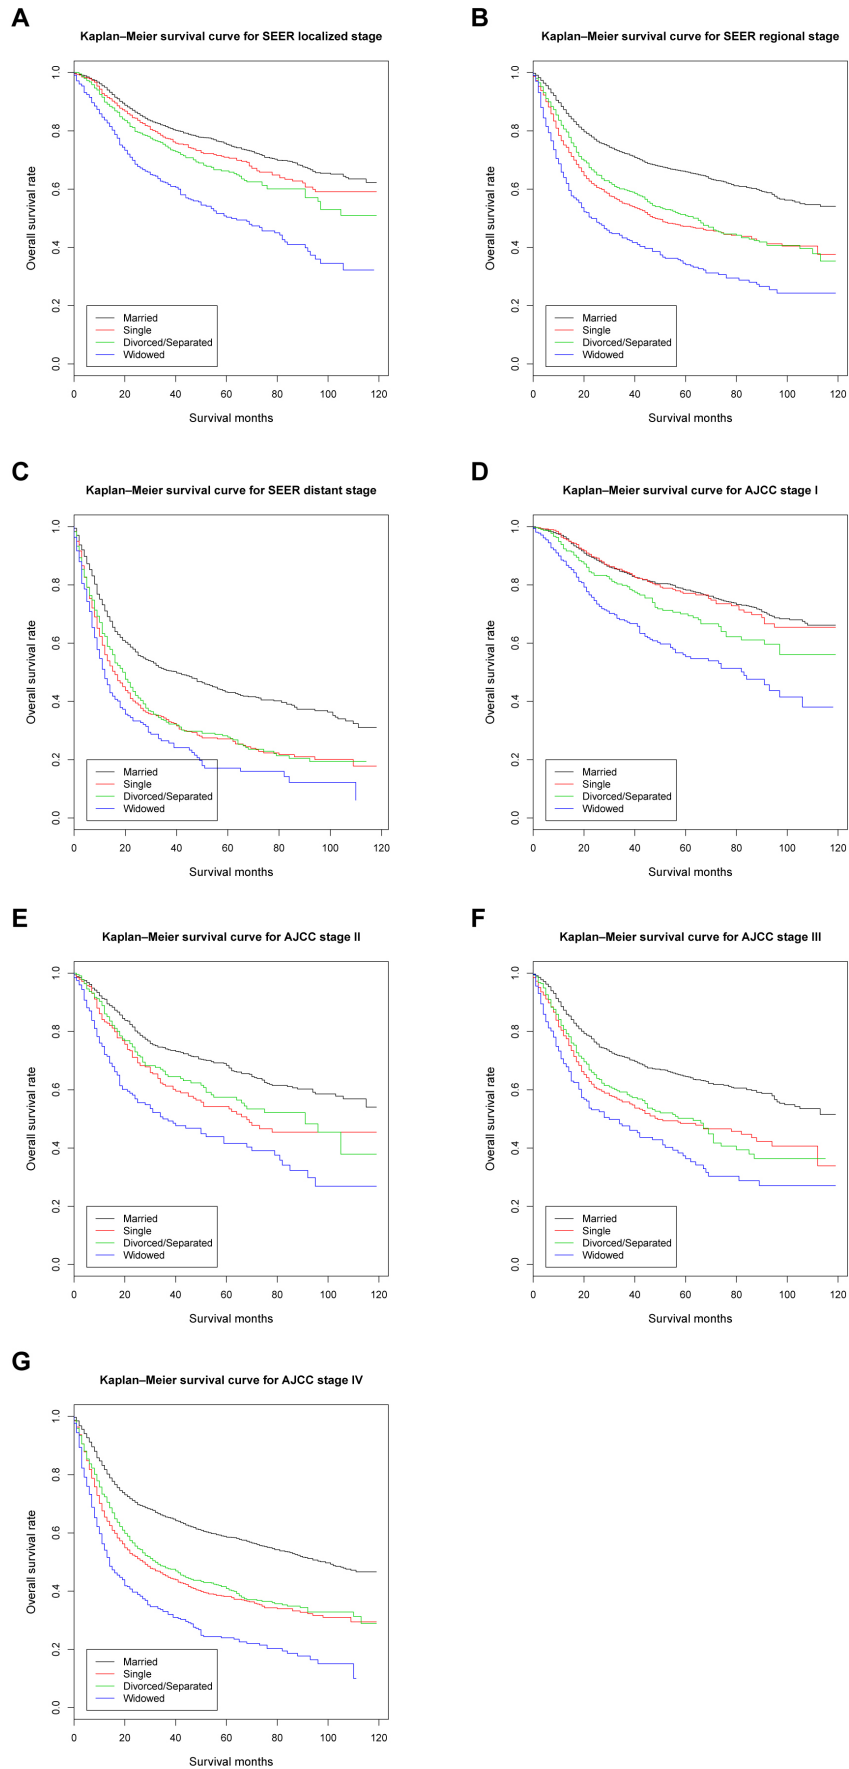

**Supplementary Figure 1: Kaplan-Meier survival curves: the overall survival in patients with oral tongue squamous cell carcinoma according to marital status. (A)** SEER localized stage:  $\chi^2 = 133$ ,  $P < 0.001$ ; **(B)** SEER regional stage:  $\chi^2 = 334$ ,  $P < 0.001$ ; **(C)** SEER distant stage:  $\chi^2 = 106$ ,  $P < 0.001$ ; **(D)** AJCC stage I:  $\chi^2 = 77.5$ ,  $P < 0.001$ ; **(E)** AJCC stage II:  $\chi^2 = 65.8$ ,  $P < 0.001$ ; **(F)** AJCC stage III:  $\chi^2 = 94.7$ ,  $P < 0.001$ ; **(G)** AJCC stage IV:  $\chi^2 = 400$ ,  $P < 0.001$ .

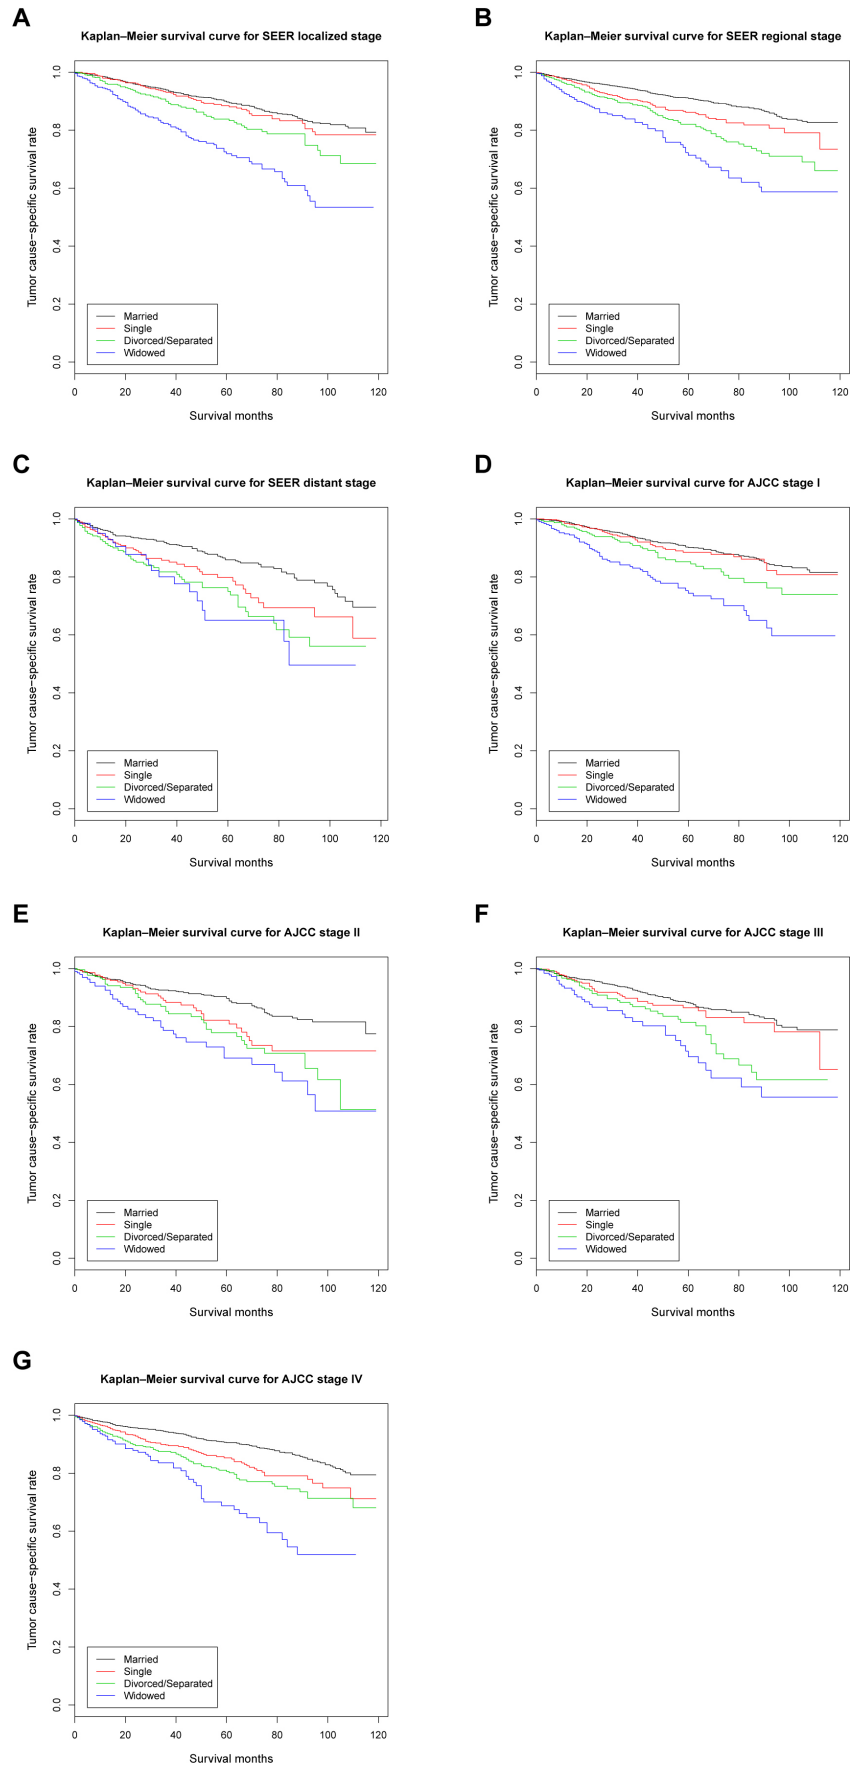

**Supplementary Figure 2: Kaplan-Meier survival curves: the tumor cause-specific survival in patients with oral tongue squamous cell carcinoma according to marital status.** (A) SEER localized stage:  $\chi^2 = 97.4$ ,  $P < 0.001$ ; (B) SEER regional stage:  $\chi^2 = 118$ ,  $P < 0.001$ ; (C) SEER distant stage:  $\chi^2 = 30.1$ ,  $P < 0.001$ ; (D) AJCC stage I:  $\chi^2 = 58.4$ ,  $P < 0.001$ ; (E) AJCC stage II:  $\chi^2 = 38.9$ ,  $P < 0.001$ ; (F) AJCC stage III:  $\chi^2 = 35.2$ ,  $P < 0.001$ ; (G) AJCC stage I:  $\chi^2 = 108$ ,  $P < 0.001$ .
